# Supplementary material for: Novel membranes with extremely high permeability fabricated by 3D printing and nickel coating for oil/water separation
Source: Royal Society of Chemistry journal article supplement (doi:10.1039/d2ta01971j), 2022-01-01
Supplement: d2ta01971j1.pdf [file d2ta01971j1.pdf]

## Supporting information

# Novel membranes with extremely high permeability fabricated by 3D printing and nickel coating for oil/water separation

Lei Han, Cheng Chen, Liguo Shen \*, Hongjun Lin \*, Bisheng Li, Zhengyi Huang,

Yanchao Xu, Renjie Li, Huachang Hong

College of Geography and Environmental Sciences, Zhejiang Normal University, Jinhua,

321004, PR China

E-mail address: hanlei@zjnu.edu.cn (L. Han); chencheng@zjnu.edu.cn (C. Chen);  
lgshen@zjnu.cn (L. G. Shen, \*Corresponding author); hjlin@zjnu.cn (H. J. Lin,  
\*Corresponding author); lbsheng@zjnu.edu.cn (B. S. Li); zyhuang@zjnu.edu.cn (Z. Y.  
Huang); ycxu@zjnu.edu.cn (Y. C. Xu); lirenjie@zjnu.cn (R. J. Li); honghc@zjnu.cn (H. C.  
Hong)

**Table. S1.** Comparison of flux and separation efficiency between the membranes in this study and those in the previous studies.

| Materials                                                | Solution type                   | Flux<br>(L/m <sup>2</sup> h) | Separation<br>efficiency (%) | FRR<br>(%)   | Ref.                  |
|----------------------------------------------------------|---------------------------------|------------------------------|------------------------------|--------------|-----------------------|
| MBPP membrane                                            | n-Hexane                        | 6000                         | 99.5                         | 94           | [1]                   |
| SNP/PBZ modified PI<br>membranes                         | Dichloromethane<br>Bromobenzene | 4500                         | 99                           | 98.0         | [2]                   |
| PE and PTFE powder-coated<br>PPS membrane                | Chloroform                      | 5190                         | ~ 98                         | 67           | [3]                   |
| PDMS/SNPs/PI membrane                                    | Trichloromethane                | 4400                         | 99.55                        | -            | [4]                   |
| Waste potato residue-coated<br>mesh                      | motor oil                       | 25200                        | 96.5                         | 52           | [5]                   |
| 3D printed membrane by<br>selective laser sintering      | n-Hexane                        | 6700                         | 99                           | -            | [6]                   |
| Nano silica-filled<br>polydimethylsiloxane (PDMS)<br>ink | n-Hexane                        | 23700                        | 99.6                         | -            | [7]                   |
| Polypyrrole (PPy)-Ni-<br>modified fabric membrane        | n-Hexane                        | 12526                        | 98.6                         | 91.8         | [8]                   |
| Diatomite coated mesh                                    | n-Hexane                        | 27000                        | 99.2                         | -            | [9]                   |
| <b>ABS-Ni membrane</b>                                   | <b>n-Hexane</b>                 | <b>53366</b>                 | <b>99.78</b>                 | <b>99.95</b> | <b>This<br/>study</b> |

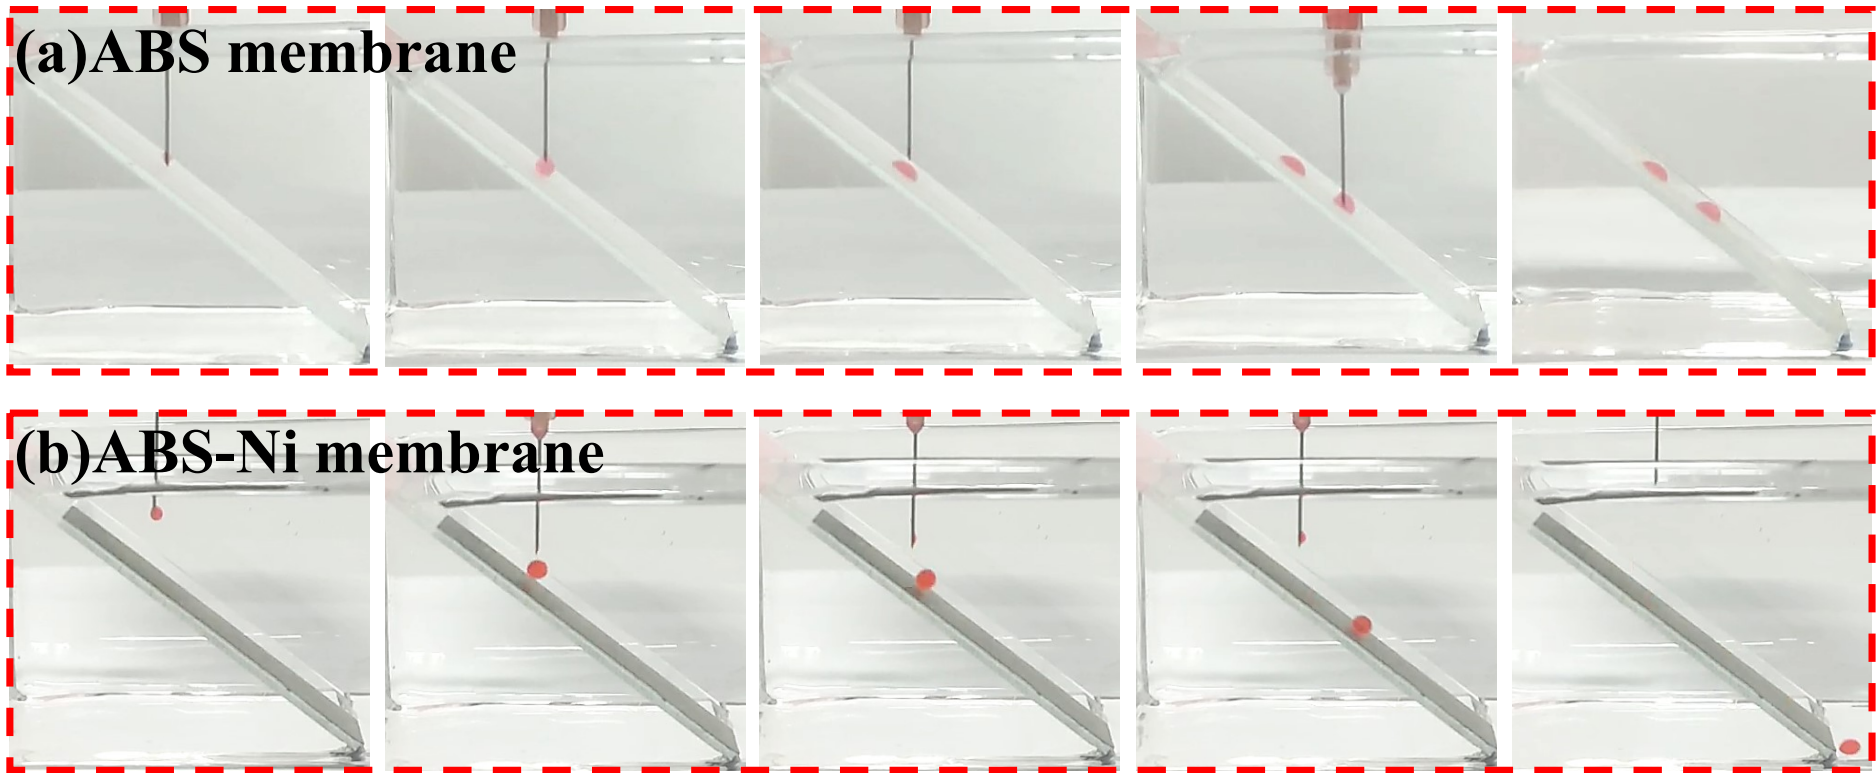

**Fig.S2.** Underwater oil dynamic contact behaviors of (a)ABS membrane,  
(b) ABS-Ni membrane.

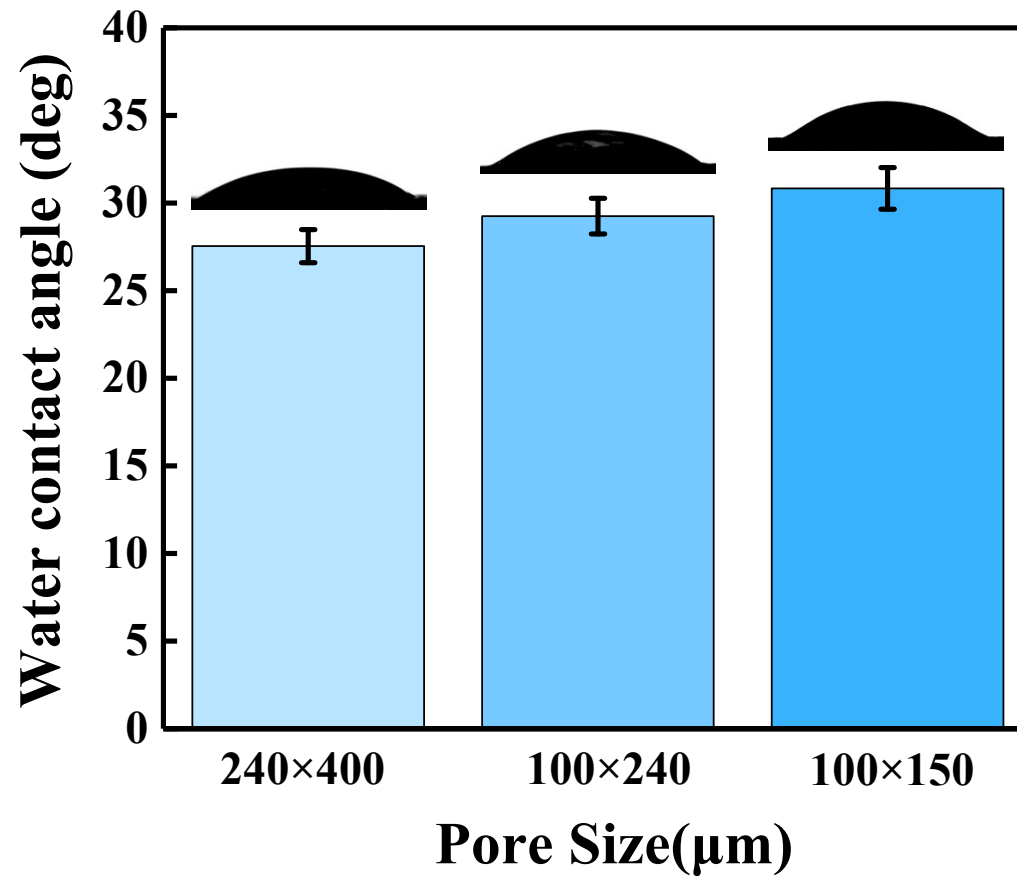

Fig. S3. WCA of modified membranes with different pore sizes.

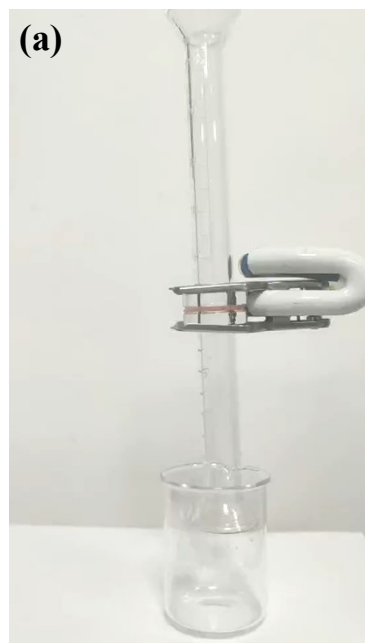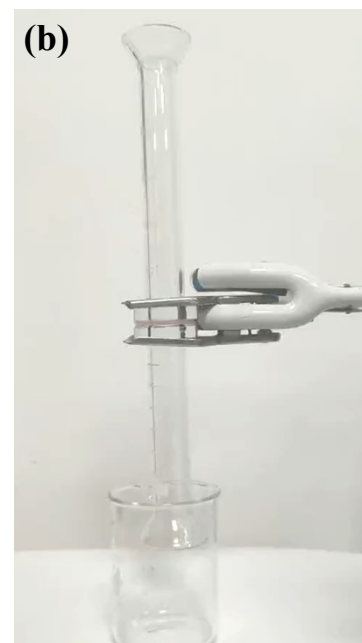

**Video. S4.** Oil-water separation process of (a)ABS membrane, (b) ABS-Ni membrane.

## References

- [1] Z. Zhang, D. Yu, X. Xu, H. Li, T. Mao, C. Zheng, J. Huang, H. Yang, Z. Niu, X. Wu, A polypropylene melt-blown strategy for the facile and efficient membrane separation of oil–water mixtures, *Chinese Journal of Chemical Engineering*, 29 (2021) 383-390.
- [2] W. Ma, M. Zhang, Z. Liu, M. Kang, C. Huang, G. Fu, Fabrication of highly durable and robust superhydrophobic-superoleophilic nanofibrous membranes based on a fluorine-free system for efficient oil/water separation, *J. Membr. Sci.*, 570-571 (2019) 303-313.
- [3] H. Huang, M. Liu, Y. Li, Y. Yu, X. Yin, J. Wu, S. Chen, J. Xu, L. Wang, H. Wang, Polyphenylene sulfide microfiber membrane with superhydrophobicity and superoleophilicity for oil/water separation, *Journal of Materials Science*, 53 (2018) 13243-13252.
- [4] M. Zhang, W. Ma, S. Wu, G. Tang, J. Cui, Q. Zhang, F. Chen, R. Xiong, C. Huang, Electrospun frogspawn structured membrane for gravity-driven oil-water separation, *J Colloid Interface Sci*, 547 (2019) 136-144.
- [5] D. Makwana, V. Polisetti, J. Castaño, P. Ray, H.C. Bajaj, Mg-Fe layered double hydroxide modified montmorillonite as hydrophilic nanofiller in polysulfone-polyvinylpyrrolidone blend ultrafiltration membranes: separation of oil-water mixture, *Appl. Clay Sci.*, 192 (2020) 105636.
- [6] S. Yuan, D. Strobbe, X. Li, J.-P. Kruth, P. Van Puyvelde, B. Van der Bruggen, 3D printed chemically and mechanically robust membrane by selective laser sintering for separation of oil/water and immiscible organic mixtures, *Chem. Eng. J.*, 385 (2020).
- [7] J. Lv, Z. Gong, Z. He, J. Yang, Y. Chen, C. Tang, Y. Liu, M. Fan, W.-M. Lau, 3D printing of a mechanically durable superhydrophobic porous membrane for oil–water separation, *J. Mater. Chem. A*, 5 (2017) 12435-12444.
- [8] R. Li, L. Rao, J. Zhang, L. Shen, Y. Xu, X. You, B.-Q. Liao, H. Lin, Novel in-situ electroflotation driven by hydrogen evolution reaction (HER) with polypyrrole (PPy)-Ni-modified fabric membrane for efficient oil/water separation, *J. Membr. Sci.*, 635 (2021) 119502.
- [9] J. Li, P. Guan, Y. Zhang, B. Xiang, X. Tang, H. She, A diatomite coated mesh with switchable wettability for on-demand oil/water separation and methylene blue adsorption, *Sep. Purif. Technol.*, 174 (2017) 275-281.
